# Supplementary material for: HRD1 prevents apoptosis in renal tubular epithelial cells by mediating eIF2α ubiquitylation and degradation
Source: PubMed Central journal article supplement (PMC5870601; doi:10.1038/s41419-017-0002-y), 2017-12-11

## **Supplemental Figure Legend**

### **Supplemental Figure 1. Glucose and palmitic acid induces death of HKC-8 cells.**

(A) HKC-8 cells were treated with glucose (0, 10, 20, and 30 mmol/L) for 24h, and then the number of cell death was analyzed. (B) HKC-8 cells were treated with PA (0, 0.2, 0.4, 0.6 and 0.8 mmol/L) for 24h, and then the number of cell death was analyzed. The results indicated that either high glucose or PA induced renal tubular epithelial cell death in a dose-dependent manner. Bars are means  $\pm$  S.E. from three independent experiments.  $\star\star P < 0.001$

### **Supplemental Figure 2. HRD1 is downregulated in apoptotic HKC-8 cells.**

HKC-8 cells were treated with glucose (0, 10, 20, and 30 mmol/L) for 24h. Glucose treatment inhibited HRD1 expression in a dose-dependent manner. The mass weight of HRD1 on western blot was around 67KD.

### **Supplemental Figure 3. HRD1 promotes eIF2 $\alpha$ ubiquitylation and degradation.**

More ubiquitin conjugated to eIF2 $\alpha$  was detected in the cells overexpressing HRD1 compared with no HRD1 transfection, which demonstrated that HRD1, as an E3 ligase, promotes eIF2 $\alpha$  ubiquitylation and degradation by the proteasome. There was a pencil line on the original blot membrane.

## Supplemental Figure 1

A

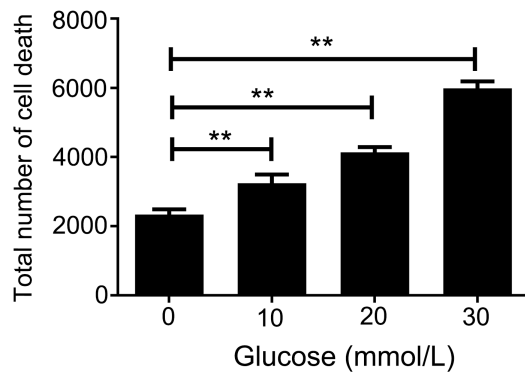

B

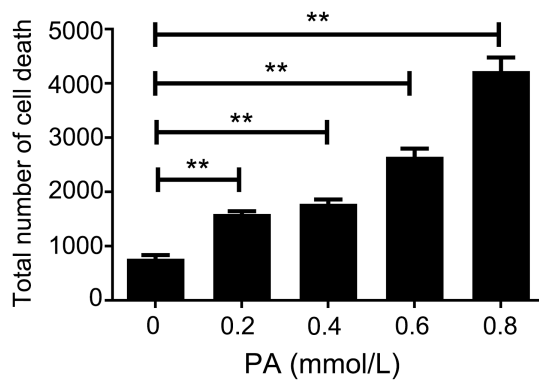

## Supplemental Figure 2

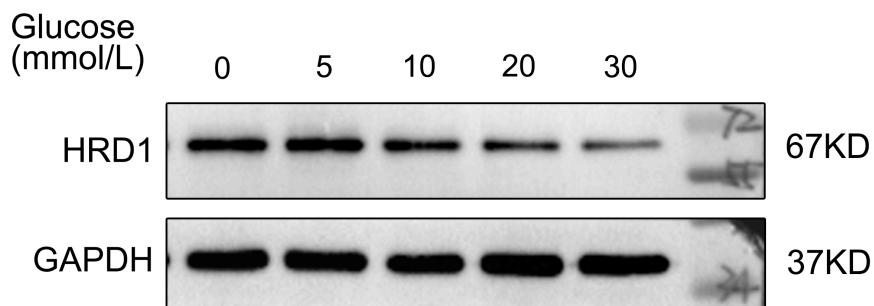

## Supplemental Figure 3

|                   |   |   |
|-------------------|---|---|
| HA-Ub             | + | + |
| Myc-eIF2 $\alpha$ | + | + |
| Ad-HRD1           | - | + |
| Vector            | + | - |
| MG132             | + | + |

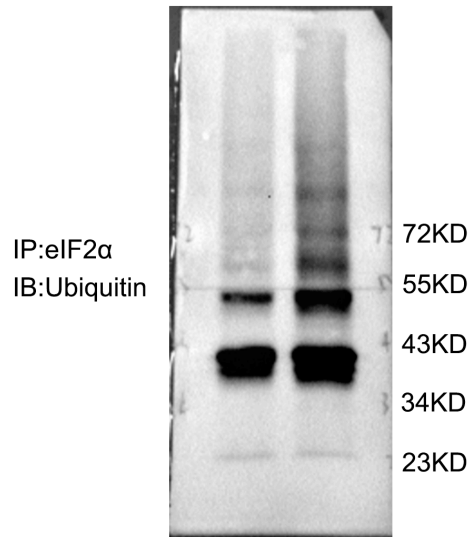

Supplement: 41419_2017_2_MOESM1_ESM.pdf [file 41419_2017_2_MOESM1_ESM.pdf]
